# Supplementary material
Source: PubMed Central journal article supplement (PMC5679255)
Supplement: NIHMS901262-supplement.pdf [file NIHMS901262-supplement.pdf]

## **SUPPLEMENTAL INFORMATION**

**O-acetylation of peptidoglycan limits  
helper T cell priming and permits  
*Staphylococcus aureus* reinfection**

**Marisel Sanchez, Stacey L. Kolar, Sabrina Müller, Christopher N. Reyes, Andrea J. Wolf, Chihiro Ogawa, Rajat Singhania, Daniel D. Carvalho, Moshe Arditi, David M. Underhill, Gislaine A. Martins, George Y. Liu**

Supplemental Data

A

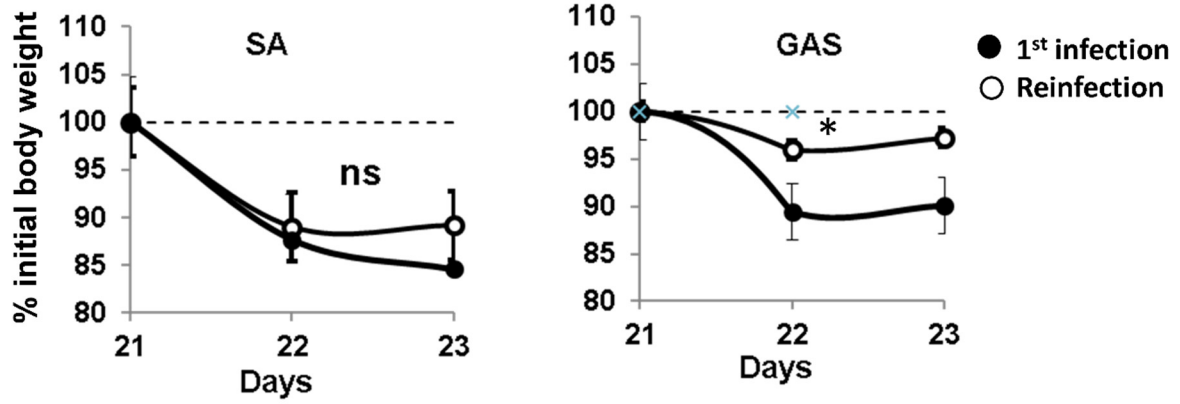

B

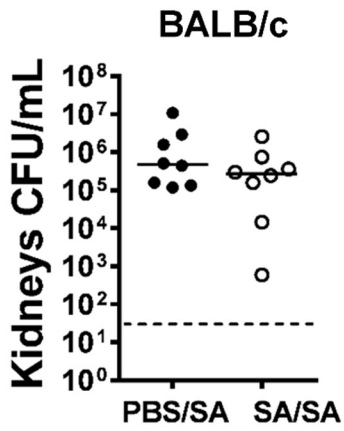

C

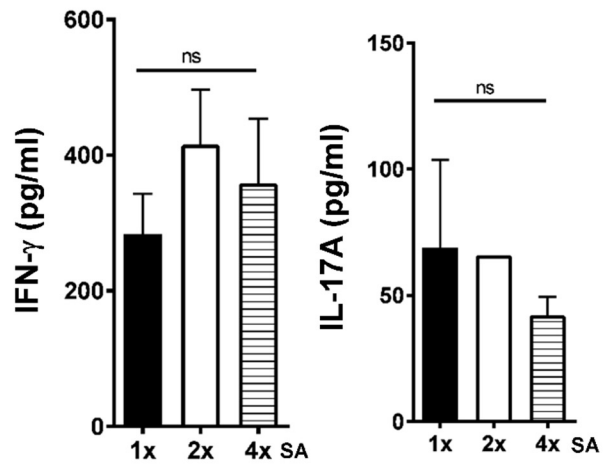

D

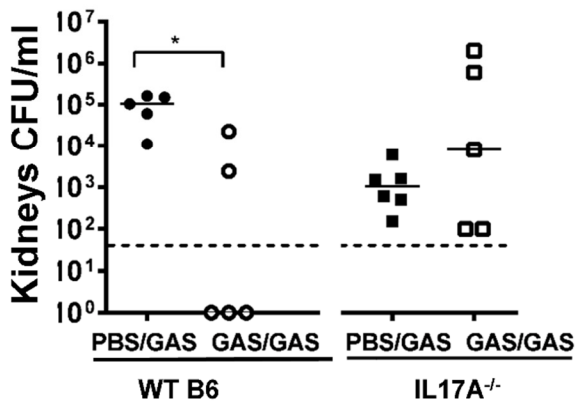

**Figure S1, related to Figure 1. Prior *S. aureus* infection does not induce protective immunity against reinfection.**

(A) Mouse body weight loss after reinfection with *S. aureus* or GAS. C57BL/6 mice (n=8-11) were injected i.p on d0 with  $10^7$  CFU of *S. aureus* (LAC USA300), GAS or PBS, and re-injected on d21 with  $10^7$  CFU of *S. aureus* or GAS. Shown is mouse body weights after infection relative to mouse body weights prior to infection.

(B) *S. aureus* does not induce protective immunity to reinfection in BALB/c mice. BALB/c mice (n = 8 per group) were injected i.p with  $10^7$  CFU of *S. aureus* (LAC USA300) or PBS on d0, and re-injected on d21 with  $10^7$  CFU of *S. aureus*. Bacteria from kidneys were recovered after 24hr.

(C) Spleen IL-17A and IFN- $\gamma$  levels in mice infected multiple times with *S. aureus*. C57BL/6 mice (n =5) were infected i.p. once, twice (d0 and 21), or four times (d0, 21, 28 and 35) with *S. aureus* LAC ( $10^7$ ). Splenocytes harvested 7 days after the last infection were stimulated with heat-killed *S. aureus* (MOI=10) for 48hr. Supernatants were analyzed by ELISA.

(D) Host resistance to GAS reinfection is IL-17A-dependent. WT C57BL/6 or IL-17A<sup>-/-</sup> mice (n=8-11) were injected i.p. with  $10^7$  CFU of GAS or PBS on d0, and inoculated on d21 with  $10^7$  CFU of GAS. CFU were enumerated 24h after the last infection.

Data were analyzed by Student's t-test (A), Mann-Whitney U test (B and D) and ANOVA

(C). \*p<0.05

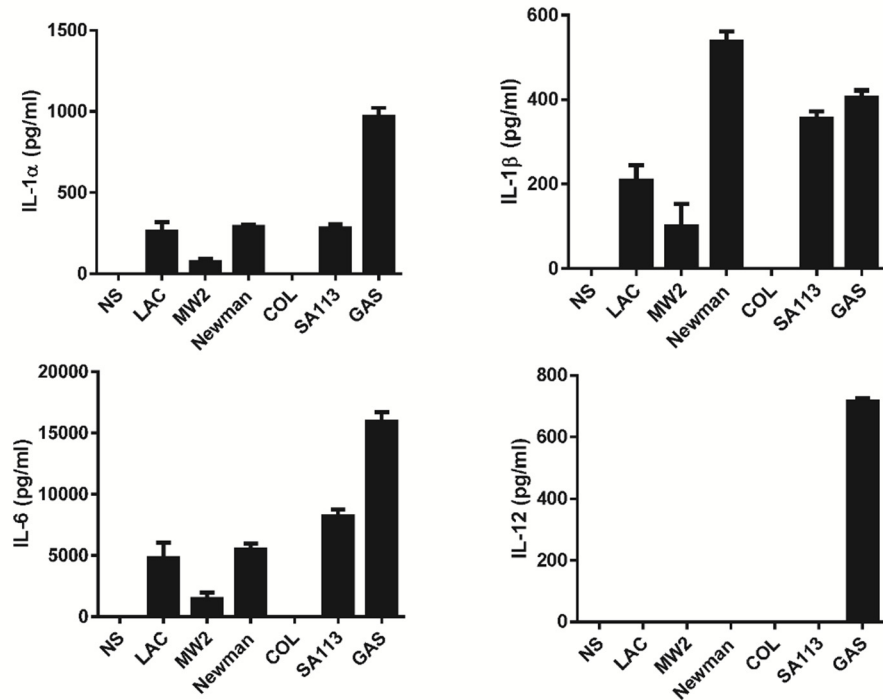

**Figure S2, related to Figure 2. GAS induces higher pro-inflammatory cytokines**

**than *S. aureus*.** Bone marrow-derived DC were left without any stimulation (NS) or incubated with strains of *S. aureus* (LAC, NW2, Newman, COL, SA113) or GAS (M49) at MOI=3. Shown are cytokine concentrations as measured by ELISA in the supernatant of DC treated for 24 hours. All data are representative of at least 2

experiments. Data are shown as mean  $\pm$  SEM and data analysis was performed using ANOVA.  $p < 0.001$  for all comparisons between GAS and *S. aureus* strains in the IL-6, IL-

1 $\alpha$  and IL-12 assays.  $p < 0.001$  for comparisons between GAS and MW2 or COL and

$p < 0.01$  for comparison between GAS and LAC in the IL-1 $\beta$  assay.

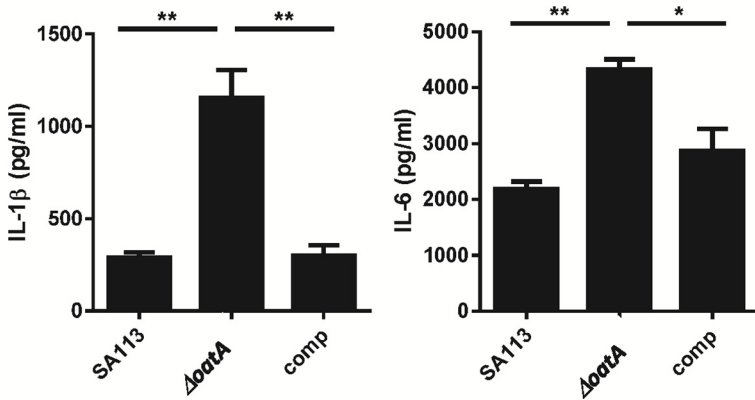

**Figure S3, related to Figure 3. O-acetylation of *S. aureus* PGN limits the induction of pro-inflammatory cytokines critical for protective memory – complementation.**

BMDC were stimulated with WT (*S. aureus* SA113),  $\Delta$ oatA (isogenic SA113 mutant) or complemented  $\Delta$ oatA at MOI of 10. Supernatants were harvested at 24h for cytokine determination. Data are representative of 2 experiments. Data analysis was performed using ANOVA. \*p<0.05, \*\*p<0.01.

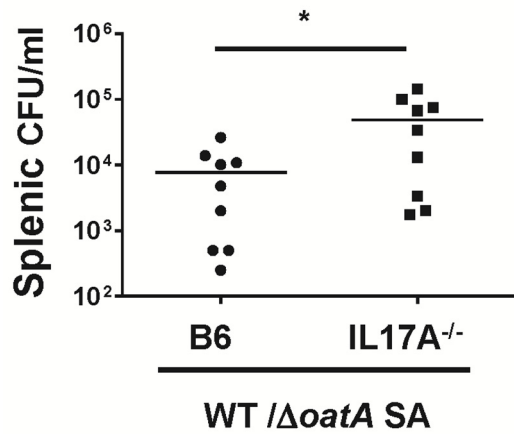

**Figure S4, related to Figure 4. Adjuvancy with  $\Delta oatA$  promotes development of protective immunity to *S. aureus* reinfection (replicate of Figure 4B).**

WT or IL-17A<sup>-/-</sup> mice were infected 3 times with *S. aureus* as in (3B). Seven days after the last infection, splenocytes were harvested and  $5 \times 10^7$  purified total CD4<sup>+</sup> T cells were transferred i.v. into naïve mice. The recipient mice were infected with WT *S. aureus* ( $2 \times 10^7$ ) the next day and spleen CFU were enumerated after 24h. Results are combined from two experiments (n=9). Data were analyzed by Mann-Whitney U test. \*p<0.05.

**Table S1, related to Figure 2. Top 100 differentially expressed (DE) genes in *S. aureus* – infected DC.**

| Up regulated  |             |             | Down regulated |              |             |
|---------------|-------------|-------------|----------------|--------------|-------------|
| Gene name     | logFC       | adj.P.Val   | Gene name      | logFC        | adj.P.Val   |
| Cxcl5         | 8.276260965 | 0.001757538 | Cables1        | -4.274064079 | 0.011157874 |
| Ifit1b1       | 7.55967165  | 0.023792655 | Eps8           | -4.092140698 | 0.002280117 |
| Cxcl3         | 7.53146553  | 0.002210827 | Ppef1          | -3.80390131  | 0.049940359 |
| Ifit3         | 7.418134105 | 0.004698437 | Scel           | -3.669406733 | 0.007451206 |
| Ifi205        | 7.308643237 | 0.024988002 | Gm11802        | -3.665304248 | 0.033066365 |
| Oasl1         | 7.222203832 | 0.011705352 | Hs3st3b1       | -3.613421824 | 0.030672388 |
| Cxcl10        | 7.118126794 | 0.011118908 | Tmem53         | -3.594471978 | 0.011161704 |
| Apol9b        | 7.086312523 | 0.000945855 | Gm17040        | -3.428336331 | 0.039898647 |
| Ifit2         | 7.069602878 | 0.002802861 | Gm20479        | -3.352359622 | 0.004698437 |
| Acod1         | 7.049947282 | 8.59E-05    | Cish           | -3.321476495 | 0.006362765 |
| Ifit3b        | 6.935922389 | 0.007264546 | Klf4           | -3.272038466 | 0.000652196 |
| Cxcl2         | 6.911287497 | 0.004490447 | Zfp985         | -3.219724871 | 0.038431856 |
| Rsad2         | 6.861075469 | 0.005366033 | Gm29358        | -3.180540771 | 0.042800377 |
| Ifit1         | 6.749270341 | 0.00220908  | Gm15539        | -3.039777734 | 0.007421397 |
| RP24-200K10.1 | 6.569804026 | 0.004490447 | Dab2           | -3.013540286 | 0.001450524 |
| Lad1          | 6.545224447 | 0.031788907 | Ipcef1         | -2.99799254  | 0.044764698 |
| Cxcl1         | 6.434693044 | 0.000924237 | Lfng           | -2.932189889 | 0.016497897 |
| Cmpk2         | 6.336911589 | 0.000556966 | Gm20667        | -2.884708404 | 0.011835206 |
| Cd40          | 6.328152237 | 0.008645666 | Slc6a19        | -2.776501982 | 0.007930912 |
| Tgfp2         | 6.213556431 | 0.006663395 | Irf4           | -2.76055348  | 0.008452146 |
| Zfp811        | 6.073426775 | 0.000556966 | Tpbg1          | -2.721861281 | 0.009373843 |
| Isg15         | 5.938193453 | 0.000677871 | Gm44993        | -2.649622948 | 0.006290693 |
| Ifi44         | 5.803170628 | 0.009972455 | Socs2          | -2.61799592  | 0.003395187 |
| Il23r         | 5.789555857 | 0.001966358 | Rab3il1        | -2.489665856 | 0.029834473 |
| Art3          | 5.72778396  | 0.017238026 | Cbfa2i3        | -2.435372806 | 0.018053754 |
| Saa3          | 5.59241909  | 0.009306115 | Diras2         | -2.413912706 | 0.022936443 |
| Ms4a4c        | 5.546987841 | 0.003860196 | RP24-264F17.4  | -2.39504215  | 5.97E-09    |
| Gp6           | 5.496900346 | 0.00689812  | Sfrp4          | -2.39504215  | 5.97E-09    |
| Irf7          | 5.480457378 | 0.000237172 | Tmem154        | -2.376231936 | 0.022187291 |
| Mefv          | 5.283609598 | 0.033244253 | RP23-424C4.7   | -2.353208774 | 0.010131126 |
| Igfp1         | 5.219355045 | 0.018053754 | Gm37488        | -2.352969242 | 2.66E-07    |
| Mx2           | 5.190845548 | 0.011118908 | Abcg1          | -2.343813117 | 0.015491202 |
| Usp18         | 5.147443514 | 0.001966358 | Spef2          | -2.33057104  | 0.043554021 |
| Ifi208        | 5.002493492 | 0.008645666 | Abcd2          | -2.325538912 | 0.036068096 |
| Tmem132e      | 4.991608985 | 0.001966358 | Gm9200         | -2.182227241 | 6.37E-05    |
| Cd69          | 4.95724577  | 0.006084741 | Pdgfc          | -2.18186917  | 0.007904627 |
| Gbp5          | 4.92062041  | 0.00689812  | Gm6283         | -2.172924457 | 0.016715782 |
| Clec4e        | 4.859167184 | 0.017474019 | Kcnn3          | -2.170738125 | 0.027590488 |
| Dnmt3c-ps     | 4.847013693 | 0.007595891 | Gm16537        | -2.163812692 | 0.047079738 |
| Oas2          | 4.820270917 | 0.001085732 | Gja5           | -2.163563324 | 0.045263026 |
| Ccl5          | 4.804367229 | 0.000109349 | Vsn11          | -2.135621062 | 0.011752484 |
| Misp          | 4.726823543 | 0.004698437 | Plekha6        | -2.113198762 | 0.030898987 |
| C530043A13Rik | 4.716355389 | 0.012082776 | Nov            | -2.081544922 | 0.023792655 |
| Tnfrsf10      | 4.639739514 | 0.006663395 | F2r12          | -2.046852258 | 0.028345738 |
| Susd2         | 4.628342943 | 0.031308389 | H2-DMb2        | -1.953004347 | 0.018053754 |
| 1110032F04Rik | 4.538302442 | 0.018015988 | Tcf7l2         | -1.889534511 | 0.03914933  |
| Oasl2         | 4.503699454 | 0.00492614  | Cnr2           | -1.888498634 | 0.040391019 |
| Gm19026       | 4.503432706 | 0.022804688 | Gm7312         | -1.851607683 | 0.00492614  |
| Satr5         | 4.498522017 | 0.042600377 | Prkea          | -1.827775379 | 0.03914933  |
| Gm37498       | 4.482543638 | 0.000945855 | Cngb1          | -1.783015711 | 0.031599779 |
| Ifi213        | 4.44211772  | 0.00689812  | Slitrik        | -1.779755466 | 0.038017004 |
| Ms4a6c        | 4.436039352 | 0.001966358 | Coro2a         | -1.767465807 | 0.011643208 |
| Rtp4          | 4.415721903 | 0.00220908  | 2410002F23Rik  | -1.735966307 | 0.023791926 |
| Ms4a6b        | 4.415370332 | 0.020473715 | Gm8883         | -1.735875146 | 0.001966358 |
| Nfkblz        | 4.402494948 | 0.006230693 | Tspan9         | -1.735875146 | 0.001966358 |
| Gm12250       | 4.385415471 | 0.001966358 | Pla2g15        | -1.733080579 | 0.012297085 |
| Akap12        | 4.358049911 | 0.011283635 | Ehbp1          | -1.689876823 | 0.012082776 |
| Gpr31b        | 4.340435086 | 0.029393521 | Ndst1          | -1.65233401  | 0.04054382  |
| Tnf           | 4.289375759 | 0.011416339 | Elovl7         | -1.646024237 | 0.03447392  |
| Sifn1         | 4.281749805 | 0.007160073 | Ptgs1          | -1.635220447 | 0.010131126 |
| Ifi206        | 4.263262307 | 0.020709818 | Plekkg3        | -1.6261926   | 0.022491721 |
| Olfir56       | 4.243378809 | 0.024339174 | Fam198b        | -1.606588009 | 0.016855807 |
| Il12a         | 4.233008208 | 0.004692253 | Add3           | -1.597231352 | 0.014430705 |
| Il1f6         | 4.23285314  | 0.007958776 | Mettl17        | -1.561527522 | 0.033769634 |
| Mx1           | 4.216272632 | 0.021621755 | Tob1           | -1.508131693 | 0.023070847 |
| Phf11b        | 4.176442346 | 0.027063548 | Pdia4          | -1.498719199 | 0.030699893 |
| Oas3          | 4.174599281 | 0.006663395 | Smap2          | -1.471669703 | 0.006495621 |
| Hrc           | 4.121444384 | 0.045263026 | Bank1          | -1.45654223  | 0.039537511 |
| Gm6904        | 4.11478936  | 0.011157874 | Myc            | -1.406037953 | 0.01099102  |
| Hdc           | 4.068839149 | 0.03461938  | Serp1          | -1.349527614 | 0.01099102  |
| Lrrc4         | 4.051572831 | 0.024931892 | Lyl1           | -1.335016366 | 0.039898987 |
| Lox           | 4.02887478  | 0.038836655 | Tmem64         | -1.328256126 | 0.042543523 |
| Isg20         | 3.996826572 | 0.003100707 | Naaa           | -1.310703435 | 0.010334628 |
| Ppfia3        | 3.966903073 | 0.001757538 | Pygl           | -1.291318699 | 0.019000968 |
| Rnf213        | 3.927840128 | 0.005644045 | Ccne1          | -1.281090088 | 0.032592984 |
| 4930512h18Rik | 3.911354171 | 0.010131126 | Rassf5         | -1.270747699 | 0.023791926 |
| Sifn8         | 3.905568141 | 0.008600906 | Klh6           | -1.265646223 | 0.040787976 |
| Dlc1          | 3.902396816 | 0.029393521 | Pcb2           | -1.263736516 | 0.03777681  |
| Gbp6          | 3.886047796 | 0.018015988 | Pced1b         | -1.257370657 | 0.04135682  |
| Ifi47         | 3.861311919 | 0.021759571 | Ttc21b         | -1.255469465 | 0.003395187 |
| Gadd45b       | 3.808123364 | 0.01057067  | Ppp1r3b        | -1.254801485 | 0.023848833 |
| Gbp2b         | 3.775103872 | 0.034585315 | Rell1          | -1.215478673 | 0.019735392 |
| Gbp3          | 3.756930864 | 0.002802861 | Tube1b         | -1.174101704 | 0.021810224 |
| Cav1          | 3.750390681 | 0.013051927 | Xbp1           | -1.166752099 | 0.045263026 |
| Ehf           | 3.745792616 | 0.023689257 | Pik3cd         | -1.164199636 | 0.037570479 |
| Gm9230        | 3.705513543 | 5.14E-06    | Arhgap18       | -1.161609691 | 0.042407691 |
| Marcks1       | 3.692575202 | 0.007878771 | Rmnd5b         | -1.141121182 | 0.015431932 |
| Gbp4          | 3.68879321  | 0.01099102  | Nek6           | -1.09717858  | 0.006663395 |
| Xaf1          | 3.653033716 | 0.001114989 | Inpp4a         | -1.090525979 | 0.030699893 |
| Gbp2          | 3.649846645 | 0.022491721 | Tarsl2         | -1.079619707 | 0.047079738 |
| Gpr84         | 3.644625351 | 0.038017004 | Elovl5         | -1.05190343  | 0.011644886 |
| Fabp3         | 3.640528471 | 0.039898647 | Lsp1           | -1.045072534 | 0.007451206 |
| Slco3a1       | 3.64041225  | 0.000652196 | Lrp6           | -1.042596784 | 0.04455417  |
| Lcn2          | 3.62795797  | 0.034585315 | Prkd3          | -1.034595867 | 0.006615006 |
| Adora2a       | 3.621892782 | 0.016616931 | Svil           | -1.034063117 | 0.010236601 |
| Herc6         | 3.56194112  | 0.007171288 | Net1           | -1.032926295 | 0.006290693 |
| Serpina3f     | 3.551811978 | 0.045297568 | ldh3a          | -1.024319532 | 0.039537511 |

**Table S2, related to Figure 2.** Top 100 differentially expressed (DE) genes in GAS – infected DC.

| Up regulated  |              |             | Down regulated |           |            |
|---------------|--------------|-------------|----------------|-----------|------------|
| Gene name     | logFC        | adj. P.Val  | Gene name      | logFC     | adj. P.Val |
| Ii6           | 11.92565504  | 0.002977933 | RP24-264F17.4  | -2.395053 | 5.97E-09   |
| Nos2          | 11.4362155   | 0.003588654 | Sfrp4          | -2.395053 | 5.97E-09   |
| Ifi1b1        | 11.38253588  | 0.001502506 | Gm37488        | -2.35298  | 2.28E-07   |
| Cxd10         | 11.28581534  | 0.000600022 | Gm9200         | -2.182238 | 4.00E-05   |
| Ifnb1         | 11.08073149  | 0.004926138 | Nek6           | -2.53362  | 0.001253   |
| Clic5         | 10.67493343  | 0.001721031 | Pdha1          | -1.100042 | 0.001552   |
| Ifi205        | 10.58551432  | 0.001775033 | Diaph1         | -1.59417  | 0.002297   |
| Tgtp1         | 10.51067886  | 0.0068754   | Oxd1           | -1.590951 | 0.002428   |
| Oasl1         | 10.42458919  | 0.000856129 | Acox3          | -1.828995 | 0.002428   |
| Art3          | 10.3536167   | 0.000600022 | Svil           | -2.316996 | 0.002428   |
| Apol9b        | 10.21784429  | 9.19E-05    | Gm26315        | -4.438698 | 0.002642   |
| Ptgs2         | 9.98562228   | 0.002453258 | Ptgr2          | -1.294722 | 0.002806   |
| Cd40          | 9.954673734  | 0.000502477 | Scd2           | -4.735645 | 0.002959   |
| Cxcl9         | 9.769725586  | 0.001601011 | Dusp3          | -2.401782 | 0.003085   |
| Ilgp1         | 9.745396036  | 0.00058496  | Plekhp3        | -4.13716  | 0.003085   |
| Ifi2          | 9.679735611  | 0.000295911 | Mlec           | -2.279296 | 0.003228   |
| Rsad2         | 9.679333566  | 0.000426909 | Cybb           | -1.514946 | 0.00323    |
| Ii12b         | 9.567986524  | 0.002411183 | Sigmar1        | -1.333353 | 0.00343    |
| Ifi3b         | 9.5348465719 | 0.000591348 | Ad3            | -3.462191 | 0.00343    |
| Tgtp2         | 9.534894421  | 0.000409134 | Smap2          | -2.336925 | 0.003744   |
| Ifi3          | 9.442955671  | 0.000506816 | Cnr2           | -5.24615  | 0.003759   |
| Cmpk2         | 9.38965751   | 4.74E-05    | Aco1           | -1.633093 | 0.00377    |
| Ifi1          | 9.348647619  | 0.000242848 | Elovl5         | -2.053863 | 0.003813   |
| Ms4a4c        | 9.262949638  | 0.000229743 | Usp48          | -1.029469 | 0.003832   |
| Cd5           | 9.200596227  | 2.66E-06    | Rmnd5b         | -2.379615 | 0.003864   |
| Ifi44         | 8.761873856  | 0.000600022 | Gltp           | -1.681018 | 0.00389    |
| Cd69          | 8.706280766  | 0.000255677 | Prkd3          | -1.561261 | 0.004217   |
| Isg15         | 8.655081653  | 7.13E-05    | Vav2           | -2.943265 | 0.004416   |
| Spta1         | 8.540039212  | 0.001298765 | Ctdsp2         | -1.765209 | 0.004558   |
| Oftr1028      | 8.52156186   | 0.000654661 | ldh1           | -2.876888 | 0.004558   |
| Gm18445       | 8.450701309  | 0.007310744 | Cbfa2l3        | -5.004826 | 0.004558   |
| Cxcl1         | 8.450401569  | 0.000846382 | Tmem154        | -5.16863  | 0.004558   |
| Serpina3f     | 8.30659625   | 0.00063446  | Nostrin        | -2.678326 | 0.004561   |
| Heatr9        | 8.254605825  | 0.000242848 | Plcb2          | -3.167049 | 0.004561   |
| Ii12a         | 8.210930462  | 0.000155212 | Kcnk3          | -4.914203 | 0.004916   |
| Angpt1        | 8.175011209  | 0.001012624 | Rack1          | -1.101944 | 0.005025   |
| Asap3         | 8.165289278  | 0.002587011 | 903061700Rik   | -1.776567 | 0.005025   |
| Pou3f1        | 8.134511271  | 0.000409599 | Rasf5          | -2.743812 | 0.005025   |
| Ii10          | 8.111730541  | 0.000527079 | Eps8           | -4.342723 | 0.005025   |
| Acd11         | 8.097941162  | 4.00E-05    | Elovl1         | -1.193103 | 0.005068   |
| Ifi208        | 8.064885725  | 0.000470031 | Gm8883         | -1.735886 | 0.005094   |
| Ii23c         | 8.01806108   | 0.000232158 | Tspan9         | -1.735886 | 0.005094   |
| Mx2           | 8.002808814  | 0.000650277 | Dhcr7          | -3.307879 | 0.005094   |
| Serpina3g     | 7.994362375  | 0.001505419 | Dnajc5         | -1.082776 | 0.005106   |
| Cxcl2         | 7.989586963  | 0.000600022 | Lyl1           | -3.257829 | 0.005106   |
| Gbp10         | 7.967658044  | 0.003981694 | Zdhc3          | -1.200268 | 0.005224   |
| Tnn           | 7.93541308   | 8.47E-05    | Gnpda1         | -2.073963 | 0.005224   |
| Ii27          | 7.920100691  | 0.000430786 | Gtf2i          | -2.673164 | 0.005224   |
| Apol9a        | 7.858038796  | 0.006970001 | Mvb12b         | -2.712294 | 0.005224   |
| Gm4841        | 7.807324371  | 0.001275676 | Fam1198b       | -2.998844 | 0.005318   |
| Akap12        | 7.796721521  | 0.000458335 | Ap2m1          | -1.042377 | 0.005546   |
| Gm13285       | 7.795069916  | 0.000890959 | Tuba1b         | -2.320407 | 0.005546   |
| Gbp4          | 7.749029064  | 0.000300992 | Gpd1l          | -2.250073 | 0.005599   |
| Zfp811        | 7.713305383  | 9.14E-05    | Cdk4           | -1.167061 | 0.005845   |
| Gm28347       | 7.627450479  | 0.000374399 | Ttc21b         | -1.348658 | 0.006      |
| Lad1          | 7.595894415  | 0.004546622 | Shtn1          | -1.340223 | 0.006085   |
| BC023105      | 7.591793222  | 0.001912952 | Trpv2          | -1.177904 | 0.006086   |
| Usp18         | 7.578802032  | 0.000156405 | Colgal1        | -1.876987 | 0.006157   |
| RP24-84E18.1  | 7.53065957   | 0.003765503 | Gna12          | -2.471543 | 0.006397   |
| Gm15247       | 7.502087356  | 0.010512964 | Lpl            | -1.121299 | 0.006503   |
| Rn225         | 7.470307682  | 0.013121972 | Mapk14         | -1.383555 | 0.006521   |
| Gm6904        | 7.439457778  | 0.000441804 | Hnmp1          | -1.666525 | 0.006521   |
| Gbp5          | 7.438084759  | 0.000447774 | Dock2          | -1.710902 | 0.006521   |
| Ifi7          | 7.435367059  | 4.00E-05    | Fads1          | -2.803775 | 0.006521   |
| Kir2          | 7.385612662  | 0.006946348 | Tmem53         | -5.568272 | 0.006521   |
| Gm13889       | 7.360443364  | 0.01093355  | Tex261         | -1.088731 | 0.006547   |
| Fam28f        | 7.349512485  | 0.000374399 | Cdc42se2       | -1.102097 | 0.006547   |
| Tnfrsf10      | 7.234393175  | 0.000386448 | Scel           | -4.8574   | 0.006547   |
| Misp          | 7.230440496  | 0.000308489 | Ptgs1          | -2.391829 | 0.006583   |
| Edn1          | 7.23004541   | 0.000953592 | Atic           | -1.594352 | 0.006903   |
| RP24-200K10.1 | 7.222394249  | 0.000675779 | Tspan32        | -3.109514 | 0.006758   |
| Cxd11         | 7.196371752  | 0.00294373  | Mdp1           | -1.481649 | 0.006769   |
| Dil1          | 7.173266395  | 0.007435966 | Lrrc56         | -1.35493  | 0.006857   |
| Ifi1b2        | 7.15489473   | 0.003225458 | Pfkfb3         | -3.305515 | 0.00702    |
| Kir1          | 7.146202294  | 0.031698567 | Arhgap19       | -3.625656 | 0.007275   |
| Phf11a        | 7.087944996  | 0.013826494 | Pira2          | -1.403436 | 0.007309   |
| Tnfrsf15      | 7.086482949  | 0.002484715 | Lsp1           | -1.330909 | 0.007434   |
| Tnfr30c       | 7.074520472  | 0.002542704 | Dhcr24         | -2.5155   | 0.007434   |
| Isg20         | 7.012746885  | 0.000155212 | Cd300a         | -1.666675 | 0.007511   |
| Cxcl5         | 6.994240244  | 0.000652615 | Kcnab2         | -2.47607  | 0.007814   |
| Ifi203-ps     | 6.983503962  | 0.010186846 | Zfp94          | -2.95249  | 0.008001   |
| Hdc           | 6.950335284  | 0.01341865  | 241002F23Rik   | -3.114725 | 0.008185   |
| Smarca1-ps1   | 6.938088158  | 0.007792101 | Fia2p15        | -2.574789 | 0.008271   |
| Ii1f6         | 6.926753788  | 0.000421733 | D6Wsu183e      | -1.741574 | 0.008273   |
| Ifi213        | 6.921214509  | 0.000405624 | Atg7           | -1.826328 | 0.008413   |
| Gm16685       | 6.899840499  | 0.008250788 | Unc119         | -2.501511 | 0.008496   |
| Sifn4         | 6.874525408  | 0.001139934 | kcnk6          | -2.237797 | 0.008883   |
| Gm7582        | 6.857646013  | 0.022803687 | Lpin1          | -4.555105 | 0.008883   |
| Ilgb8         | 6.839211411  | 0.004226332 | Mthc1          | -1.288706 | 0.008886   |
| Gm42519       | 6.801110086  | 0.042432945 | 1810011H11Rik  | -4.193046 | 0.008886   |
| Dnmt3c-ps     | 6.779928207  | 0.000584517 | Esys1          | -1.502352 | 0.008983   |
| A630012P03Rik | 6.777044852  | 0.000502477 | Naaa           | -1.750644 | 0.009353   |
| Tnfr30b       | 6.761129789  | 0.000441804 | Aspm           | -4.095644 | 0.009353   |
| Ifi206        | 6.759937527  | 0.001081373 | Rab31l1        | -4.510406 | 0.009451   |
| Nts           | 6.716158061  | 0.000685743 | Csf1r          | -1.226853 | 0.009622   |
| Olf56         | 6.709141182  | 0.001275676 | Arhgap18       | -2.315181 | 0.009622   |
| Gm21742       | 6.693796159  | 0.040141442 | Gm20479        | -3.352371 | 0.009841   |
| Tnfrsf11b     | 6.693468945  | 0.001145913 | Wsb2           | -1.138047 | 0.009888   |
| Hsp1          | 6.671312799  | 0.000306284 | Dip2b          | -1.43747  | 0.010126   |
| Tnf           | 6.664155478  | 0.000652128 | Ipcef1         | -5.967697 | 0.010139   |
